# Supplementary material for: Adaptive method of lines for multi-component aerosol condensational growth and CCN activation
Source: Copernicus journal article supplement (doi:10.5194/gmd-4-15-2011), 2011-01-21
Supplement: Supplementary file 1 [file drops-1.1-manual.pdf › supplement/drops-1.1-manual.pdf]

# drops 1.1 - manual

Sylwester Arabas\*

December 21, 2010

## Abstract

This manual describes the usage and some technical aspects of the C++ implementation of the CCN activation model described in Arabas and Pawlowska (2010). Both the source code and this manual are supplements to the paper. The user is encouraged to google for any newer version of this manual and the source code, though (at the time of writing this manual the development is hosted at Gna!: <http://gna.org/projects/drops/>). The implementation is named *drops* (name of a candy in Polish) and is free software released under the GNU GPL. Bug reports and contributions are highly welcome!

## Contents

|          |                                              |          |
|----------|----------------------------------------------|----------|
| 0.1      | Dependencies                                 | 1        |
| 0.2      | Tarball contents                             | 2        |
| 0.3      | Configuration and compilation                | 2        |
| <b>1</b> | <b>User's guide</b>                          | <b>3</b> |
| 1.1      | Command line interface (CLI)                 | 3        |
| 1.2      | Web-based graphical user interface (web GUI) | 4        |
| 1.3      | Model options                                | 5        |
| <b>2</b> | <b>Developer's guide (a stub of it ...)</b>  | <b>7</b> |
| 2.1      | Program structure, error handling            | 7        |
| 2.2      | Class hierarchy                              | 8        |

---

## 0.1 Dependencies

### C++ compiler

Drops is written in C++ utilizing the Boost.Units library, the latter being "fairly demanding of compiler compliance to ISO standards". The code was tested with **GCC** 4.0, 4.2 and 4.3 on Linux and OS X.

### External libraries

Drops requires the following libraries to be available during compilation/runtime:

- **Boost** (for Boost.Units) available at <http://www.boost.org/>
- **SUNDIALS** (for CVODE and NVECTOR\_SERIAL) available at <http://computation.llnl.gov/casc/sundials/>
- **GSL** available at <http://www.gnu.org/software/gsl/> (tested with v4.4, will not work with v4.0 or older)

### External programs/services

Both the CLI and GUI rely on **gnuplot** (<http://www.gnuplot.info/>). SVG support in gnuplot is required for the GUI. The GUI requires an **HTTP server** equipped with a recent version of **PHP** at server-side (tested with Apache and PHP5) and an **SVG-aware browser** at client-side (tested with Firefox and Safari). The PHP scripts rely on the `exec()` and `proc_open()` calls, and the nice shell command.

---

\*Institute of Geophysics, Faculty of Physics, University of Warsaw, Poland ([sarabas@igf.fuw.edu.pl](mailto:sarabas@igf.fuw.edu.pl))

## 0.2 Tarball contents

The drops tarball contains the following directories and files referenced hereinafter:

```
drops/ .....
|-- COPYING ..... the text of GPL v3
|-- configure ..... autoconf-generated configuration shell script
|-- doc .....
|   |-- drops.bib ..... BibTeX records used in paper.tex and manual.tex
|   |-- manual .....
|       |-- Makefile ..... compilation rules for LATEX/BibTEX
|       |-- manual.tex ..... LATEX source of this document
|       |-- ... .....
|-- src .....
|   |-- drops.hpp ..... definitions of abstract classes
|   |-- *.hpp ..... implementations of the above (mostly one class per file)
|   |-- drops.cpp ..... the only .cpp file here, contains main(), includes all of the headers above
|   |-- ... .....
|-- webgui .....
|   |-- index.php ..... the main web-GUI file (contains <frameset>)
|   |-- *.php ..... other web-GUI files
|-- ... .....
```

## 0.3 Configuration and compilation

Drops uses the GNU build system, hence the configuration and compilation (of the src/drops executable) should go as follows:

```
$ tar xvjf drops.tar.bz2
$ cd drops
$ ./configure
$ make
```

There are also makefiles for the documentation that call pdf<sub>l</sub>at<sub>e</sub>x and bib<sub>t</sub>ex in the right order and the needed number of times, hence one can compile the doc/manual/manual.tex and the doc/paper/paper.tex files by invoking:

```
$ cd doc/manual
$ make
$ cd ../..
```

The PHP files of the web interface are placed in the webgui directory hence one needs to point the web server to this directory. The webgui, in turn, calls the drops executable assuming it is located in ../src/drops with relation to the PHP script location. One option is to make a symlink to the webgui directory within the server's docroot, for example (on OS X with Web Sharing enabled) by invoking:

```
$ ln -s `pwd`/webgui ~/Sites/drops
```

The webgui should then be available at <http://localhost/~USERNAME/drops/>

# 1 User's guide

## 1.1 Command line interface (CLI)

The drops executable accepts UNIX-like command line options for defining model input and parameters. The list of options is discussed in section 1.3, and is available after typing:

```
$ ./src/drops --help
```

Drops communicates with the user via standard error, and by default sends gnuplot commands to standard output, hence a typical a typical invocation sequence is:

```
$ ./src/drops OPTIONS | gnuplot
```

or if the user wants to save the model output or alter the plot parameters:

```
$ ./src/drops OPTIONS > drops_output.gpi  
$ gnuplot drops_output.gpi
```

A screenshot showing an example simulation run using the CLI with the drops output redirected to gnuplot, which in turn used AquaTerm for drawing the plot, is show below:

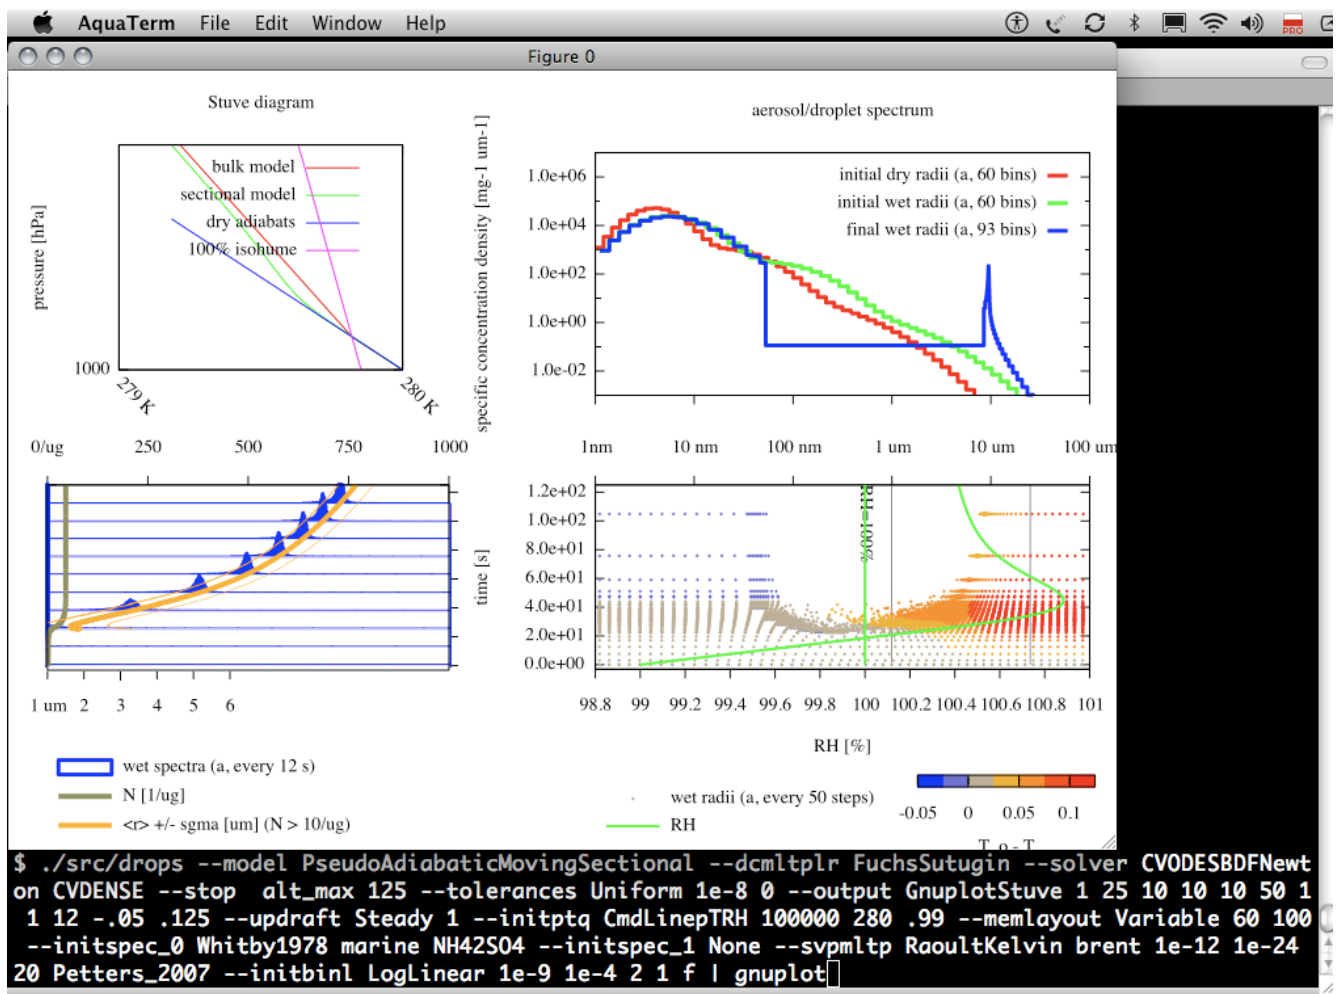

## 1.2 Web-based graphical user interface (web GUI)

The web GUI consists of two frames. The left-hand side frame contains an HTML form in which simulation parameters are set. The right-hand side frame is used to display the model output in the form of an SVG plot in case of success, or the messages sent by drops to standard error in case of failure. The web GUI has two modes of operation:

### Single-simulation mode

This mode is chosen by clicking on the *single-run* button. One simulation at a time is run and its output is shown in the right-hand side frame. The default values filled in the form constitute the set-up used in section 3.1 of the article but with adaptivity.

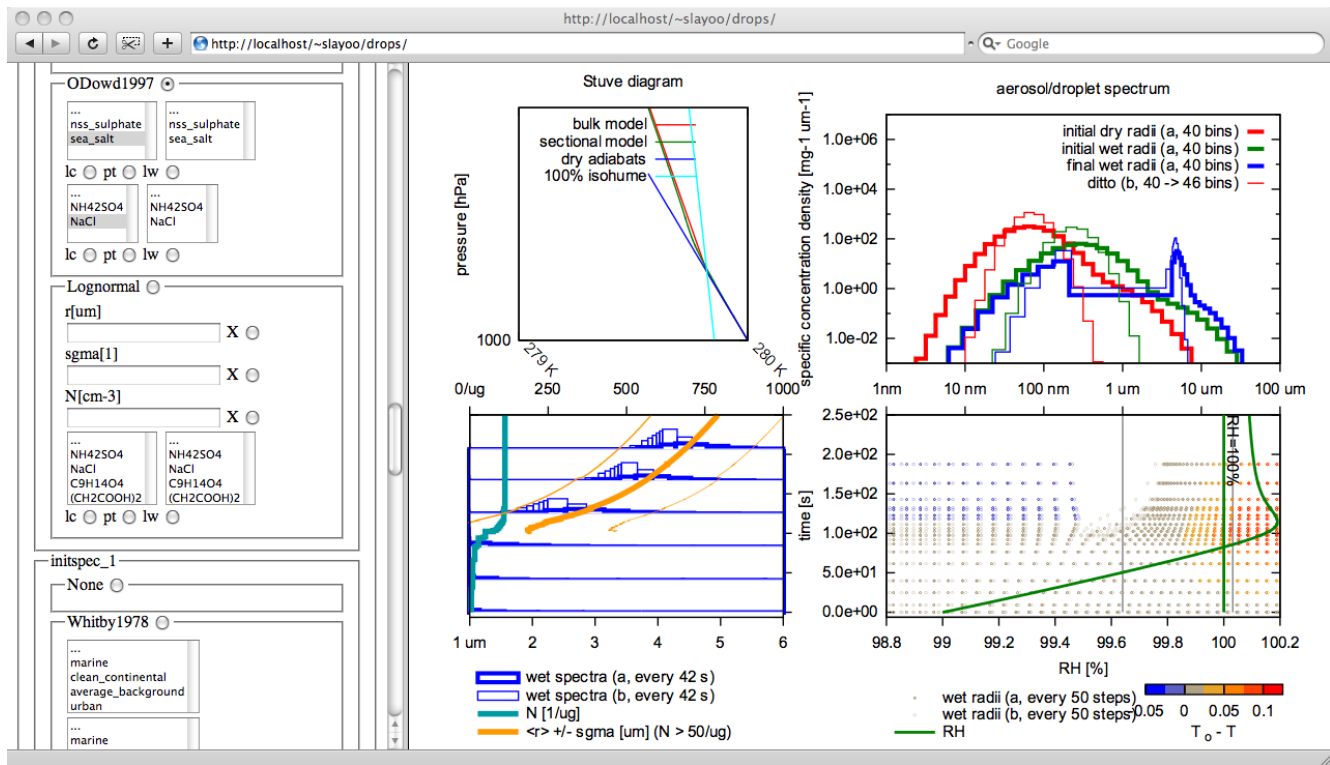

### Multiple-simulation mode

This mode is chosen by clicking on the *multi-run* button and is intended for running multiple simulations with one, two, free or four parameters of the model being altered between the simulations. The results are summarised in the plots displayed in the right-hand side frame. The number of plots correspond to the number of parameters chosen in the box just above the *multi-run* button (see picture below). The x-axes of the plots represent the parameter marked as X in the form (see picture above). The range over which X is varied is defined by filling in the X=, X< and the X+= form fields (see picture below). The width of the lines on the plot, the type of symbols, and their color may be chosen to correspond to other parameters being varied in the multi-run mode by marking a parameter as lw, pt and lc, respectively (see picture above). The corresponding set of values of the lw- pt- or lc-marked parameter has to be than supplied in a right-hand side select box in the form (see picture above).

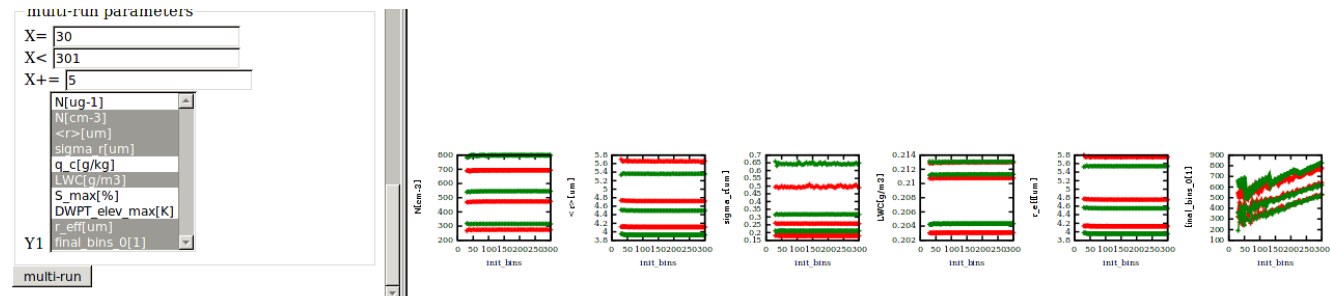

### 1.3 Model options

The following options of the model are available for setting in both the CLI and GUI. The default values can be obtained by invoking drops with the `--help` option, and are visible in the GUI.

#### model

**PseudoAdiabaticMovingSectional** needs one parameter:

- drop growth formulation, one of:  
**Fick** Fick's law (including drop temperature tracking)  
**MaxwellMason** Maxwell-Mason formula

**stop** stopping condition, one of:

**t\_max** stop at a given time, needs one argument:

**t** the time in seconds

**alt\_max** stop at a given altitude, needs one argument:

**h** the altitude in meters

**updraft** profile of vertical velocity with time, one of:

**Steady** constant, needs one parameter:

**U** vertical velocity in  $m/s$

**SteadyPredefined** constant, needs one parameter:

- vertical velocity in  $m/s$ , one of:  
**.1,.25,.5,1,4,5,10**

**Bells** bell-shaped profile defined by  $w(t) = U_{max} \sin(2\pi t/T) \cdot |\sin(2\pi t/T)|$ , needs two parameters:

**U\_max**  $U_{max}$  in the above formula (in  $m/s$ )

**period**  $T$  in the above formula (in  $s$ )

**initptq** initial pressure, temperature, specific humidity; one of:

**CmdLine** needs three parameters:

**p** pressure in  $Pa$

**T** temperature in  $K$

**q\_v** specific humidity in  $kg/kg$

**CmdLineTRH** **p** pressure in  $Pa$

**T** temperature in  $K$

**RH** relative humidity, dimensionless (not per cent)

**memlayout** ODE state-vector memory layout, one of:

**Variable** variable (needed for adaptivity), needs two parameters:

**max\_bins** maximum number of bins (approximately, per spectrum)

**max\_mult** maximum ratio of log radius to the initial value (cf. the article)

**noise\_spec\_conc** the tolerance (cf. the article)

**Constant** constant

**dcmltplr** multiplier of the diffusion constants, one of:

**FuchsSutugin** the Fuchs-Sutugin formula (enabling transition régime corrections)

**Unity** unity (disabling the transition régime corrections)

**specprop\_0** aerosol composition (for the first chemical component), one of:

**Constant** needs two parameters:

- chemical component, one of:  
**NH42SO4, NaCl, kappa=1.28, kappa=0.64, kappa=0.32, kappa=0.16, kappa=0.08, kappa=0.04, kappa=0.02, kappa=0.01, kappa=0.005**
- how to treat initial aerosol size spectrum, one of:  
**dry, wet**

**initspec\_0** dry aerosol size spectrum (for the first chemical component), one of:

**Whitby1978** tri-modal log-normal distributions from Whitby (1978), needs one parameter:

- air-mass type, one of:

**marine, clean\_continental, average\_background, urban**

**Jaenicke1993** tri-modal log-normal distributions from Jaenicke (1993), needs one parameter:

- air-mass type, one of:

**polar, background, maritime, remote\_continental, desert\_dust\_storm, rural, urban**

**ODowd1997** log-normal distributions from O'Dowd et al. (1997), needs one parameter:

- size-spectrum:
  - nss\_sulphate** (single-mode distribution)
  - sea\_salt** (tri-modal distribution)

**Lognormal** single-mode log-normal distribution, needs three parameters:

- r** mode radius in  $\mu m$
- sgma** geometric standard deviation (dimensionless)
- N** total concentration in the mode in  $cm^{-1}$

**FromFile** read from file, needs one parameter:

- filename** file name

**specprop\_1** aerosol composition (for the second chemical component), one of:

- None**
- ... (the same set of values as for specprop\_0)

**initspec\_1** dry aerosol size spectrum (for the second chemical component), one of:

- None**
- ... (the same set of values as for initspec\_0)

**svpmltp** vapour pressure over solution droplet, one of:

**Raoult** Raoult term only

**RaoultKelvin** Raoult and Kelvin terms, needs five arguments:

- root-bracketing method, one of:
  - brent**
  - falsepos**
  - bisection**
- relative\_tolerance** relative tolerance for root-bracketing
- noise\_level** absolute tolerance for root-bracketing
- max\_iter** maximum number of iterations for root-bracketing
- chemical composition parameterization, one of:
  - Konopka\_1996** using density, van't Hoff factor etc... (see e.g. Konopka, 1996)
  - Petters\_2007** using single parameter  $\kappa$  (Petters and Kreidenweis, 2007)

**dcmltplr\_mass** water vapour diffusion coefficient multiplier, one of:

**FuchsSutugin** transition regime correction, needs one parameter:

- mass accommodation coefficient, one of:
  - .04, .042, .1, .5, 1**

**Unity** no corrections

**dcmltplr\_heat** heat diffusion coefficient multiplier, one of:

**FuchsSutugin** transition regime correction, needs one parameter:

- heat accommodation coefficient, one of:
  - .04, .042, .1, .5, 1**

**Unity** no corrections

**initbinl** initial layout of bins, one of:

**LogLinear** linear in log radius, needs three parameters (last two are related with the adaptivity)

- init\_bins** initial number of bins (per spectrum)
- min** minimum radius in  $m$
- max** maximum radius in  $m$

**Instrument** instrument-specific layout, needs one parameter:

- instrument, one of:
  - SMPS, OPC, SMPS+OPC, SMPS+gap+OPC**

**solver** ODE solver, one of:

**CVODESAdamsFunctional** the Adams-Moulton method with functional iteration (suitable for non-stiff systems)

**CVODESBDFNewton** the BDF formula with Newton iteration (suitable for stiff systems), needs one argument:

- Jacobian matrix representation, one of:
  - CVDIAG** diagonal approximation
  - CVDENSE** dense matrix using difference quotients
  - CVDENSE-JAC** dense matrix using analytical Jacobian

**tolerances** ODE solver tolerances, one of:

**Uniform** same tolerances for all variables, needs two arguments:

**relative\_tolerance** the relative tolerance

**noise\_level** the absolute tolerance

**output** Output format:

**GnuplotStuve** gnuplot script with four plots including a Stuve diagram, needs 11 arguments:

**cloud\_min**  $r_{min}$  in  $\mu m$  (consult the paper)

**cloud\_max**  $r_{max}$  in  $\mu m$  (consult the paper)

**N\_min** minimum concentration for which spectral parameters are plotted, in  $\mu g^{-1}$

**n\_spec** number of spectra drawn in the bottom-right plot

**div\_spec** scaling factor for the above spectra

**dot\_step** dots are plotted in the bottom-right plot every **dot\_step** records

**rec\_step** records are output every **rec\_step** ODE solver time-steps

**range\_r\_min** lower range of the x-axis in the bottom-left plot (in  $\mu m$ )

**range\_r\_max** upper range of the x-axis in the bottom-left plot (in  $\mu m$ )

**range\_delta\_t\_min** lower range of the colour-scale (in  $K$ )

**range\_delta\_t\_max** upper range of the colour-scale (in  $K$ )

**GnuplotSpecEvol** gnuplot script for a 3D spectrum evolution plot

**n\_spec** number of spectra

**div\_spec** scaling factor

**rec\_step** records are output every **rec\_step** ODE solver time-steps

## 2 Developer's guide (a stub of it ...)

### 2.1 Program structure, error handling

The drops.cpp file contains the main() function and is the only non-header file. The drops.hpp file defines numerous abstract classes which have their implementations in other header files (mostly one class per file). Error handling is carried out using the standard *exception* class. The exceptions are caught in main() and triggering an error is done with the following sequence:

```
cerr << "message" << endl;  
throw exception();
```

## 2.2 Class hierarchy

All classes inherit from class root which is an abstract class with a virtual destructor. This enforces execution of child-class destructors. The hierarchy of classes is as follows (the file in which a class is defined is indicated on the right):

|                                             |       |                                         |
|---------------------------------------------|-------|-----------------------------------------|
| root                                        | ..... | drops.hpp                               |
| constants                                   | ..... | constants.hpp                           |
| ModelParams                                 | ..... | drops.hpp                               |
| ModelPseudoAdiabaticBulk::params            | ..... | ModelPseudoAdiabaticBulk.hpp            |
| ModelPseudoAdiabaticMovingSectional::params | ..... | ModelPseudoAdiabaticMovingSectional.hpp |
| DiffCoeffMltplr                             | ..... | drops.hpp                               |
| DiffCoeffMltplrFuchsSutugin                 | ..... | DiffCoeffMltplrFuchsSutugin.hpp         |
| DiffCoeffMltplrUnity                        | ..... | DiffCoeffMltplrUnity.hpp                |
| DropGrowthEq                                | ..... | drops.hpp                               |
| DropGrowthEqFick                            | ..... | DropGrowthEqFick.hpp                    |
| DropGrowthEqMaxwellMason                    | ..... | DropGrowthEqMaxwellMason.hpp            |
| InBinSpectrum                               | ..... | drops.hpp                               |
| InBinSpectrumConstNr                        | ..... | InBinSpectrumConstNr.hpp                |
| InitBinLayout                               | ..... | drops.hpp                               |
| InitBinLayoutInstrument                     | ..... | InitBinLayoutInstrument.hpp             |
| InitBinLayoutLogLinear                      | ..... | InitBinLayoutLogLinear.hpp              |
| InitpTq                                     | ..... | drops.hpp                               |
| InitpTqCmdLine                              | ..... | InitpTqCmdLine.hpp                      |
| InitpTqCmdLinepTRH                          | ..... | InitpTqCmdLinepTRH.hpp                  |
| InitSpectrum                                | ..... | drops.hpp                               |
| InitSpectrumLognormal                       | ..... | InitSpectrumLognormal.hpp               |
| InitSpectrumJaenicke1993                    | ..... | InitSpectrumJaenicke1993.hpp            |
| InitSpectrumODowd1997                       | ..... | InitSpectrumODowd1997.hpp               |
| InitSpectrumWhitby1978                      | ..... | InitSpectrumWhitby1978.hpp              |
| InitSpectrumFromFile                        | ..... | InitSpectrumFromFile.hpp                |
| Model                                       | ..... | drops.hpp                               |
| ModelPseudoAdiabaticBulk                    | ..... | ModelPseudoAdiabaticBulk.hpp            |
| ModelPseudoAdiabaticMovingSectional         | ..... | ModelPseudoAdiabaticMovingSectional.hpp |
| Output                                      | ..... | drops.hpp                               |
| OutputGnuplot                               | ..... | gnuplot.hpp                             |
| OutputGnuplotOneLine                        | ..... | OutputGnuplotOneLine.hpp                |
| OutputGnuplotSpecEvol                       | ..... | OutputGnuplotSpecEvol.hpp               |
| OutputGnuplotStuve                          | ..... | OutputGnuplotStuve.hpp                  |
| SatVapPresMltplr                            | ..... | drops.hpp                               |
| SatVapPresMltplrKelvin                      | ..... | SatVapPresMltplrKelvin.hpp              |
| SatVapPresMltplrLinearRwRd                  | ..... | SatVapPresMltplrLinearRwRd.hpp          |
| SatVapPresMltplrRaoult                      | ..... | SatVapPresMltplrRaoult.hpp              |
| SatVapPresMltplrRaoultPetters_2007          | ..... | SatVapPresMltplrRaoultPetters_2007.hpp  |
| SatVapPresMltplrRaoultKelvin                | ..... | SatVapPresMltplrRaoultKelvin.hpp        |
| SatVapPresMltplrUnity                       | ..... | SatVapPresMltplrUnity.hpp               |
| Solute                                      | ..... | drops.hpp                               |
| SoluteAmmoniumSulphate                      | ..... | Solutes.hpp                             |
| SoluteKappaKohlerOnly                       | ..... | Solutes.hpp                             |
| SoluteKappa1_28                             | ..... | Solutes.hpp                             |
| SoluteKappa0_64                             | ..... | Solutes.hpp                             |
| SoluteKappa0_32                             | ..... | Solutes.hpp                             |
| SoluteKappa0_16                             | ..... | Solutes.hpp                             |
| SoluteKappa0_08                             | ..... | Solutes.hpp                             |
| SoluteKappa0_04                             | ..... | Solutes.hpp                             |
| SoluteKappa0_02                             | ..... | Solutes.hpp                             |
| SoluteKappa0_01                             | ..... | Solutes.hpp                             |
| SoluteKappa0_005                            | ..... | Solutes.hpp                             |
| Solver                                      | ..... | drops.hpp                               |
| SolverCVODES                                | ..... | sundials.hpp                            |
| SolverCVODESAdamsFunctional                 | ..... | SolverCVODESAdamsFunctional.hpp         |
| SolverCVODESBDFNewton                       | ..... | SolverCVODESBDFNewton.hpp               |
| SpectraMemLayout                            | ..... | drops.hpp                               |
| SpectraMemLayoutVariable                    | ..... | SpectraMemLayoutVariable.hpp            |
| Tolerances                                  | ..... | drops.hpp                               |
| TolerancesUniform                           | ..... | TolerancesUniform.hpp                   |
| Updraft                                     | ..... | drops.hpp                               |
| UpdraftBells                                | ..... | UpdraftBells.hpp                        |
| UpdraftSteady                               | ..... | UpdraftSteady.hpp                       |



## References

- Arabas, S. and Pawlowska, H.: Adaptive method of lines for multi-component aerosol condensational growth and CCN activation, *Geosci. Model. Dev.*, (submitted), 2010.
- Jaenicke, R.: Tropospheric aerosols, in: *Aerosol-cloud-climate interactions*, edited by Hobbs, P., pp. 1–31, Academic Press, San Diego, 1993.
- Konopka, P.: A Reexamination of the Derivation of the Equilibrium Supersaturation Curve for Soluble Particles, *J. Atmos. Sci.*, 53, 3157–3163, 1996.
- O'Dowd, C., Smith, M., Consterdine, I., and Lowe, J.: Marine aerosol, sea-salt, and the marine sulphur cycle: a short review, *Atmos. Environ.*, 31, 73–80, doi:10.1016/S1352-2310(96)00106-9, 1997.
- Petters, M. and Kreidenweis, S.: A single parameter representation of hygroscopic growth and cloud condensation nucleus activity, *Atmos. Chem. Phys.*, 7, 1961–1971, doi:10.5194/acp-8-6273-2008, 2007.
- Whitby, K.: The physical characteristics of sulfur aerosols, *Atmos. Environ.*, 12, 135–159, doi:10.1016/0004-6981(78)90196-8, (reprinted in *Haagen-Smit Prize Special Supplement*, *Atmos. Environ.*, 41, S25–S49, doi: 10.1016/j.atmosenv.2007.10.057, 2007), 1978.
